# Supplementary material for: Intramolecular and Intermolecular Interaction Switching in the Aggregates of Perylene Diimide Trimer: Effect of Hydrophobicity
Source: MDPI journal article supplement (doi:10.3390/molecules28073003), 2023-03-28
Supplement: s1 [file s1]

# Supporting information

## Intramolecular and Intermolecular Interaction Switching in the Aggregates of Perylene Diimide Trimer: Effect of Hydrophobicity

Peiyuan Su <sup>1,†</sup>, Guangliu Ran <sup>1,†</sup>, Hang Wang <sup>3</sup>, Jianing Yue <sup>1</sup>, Qingyu Kong <sup>2,\*</sup>, Zhishan Bo <sup>3</sup> and Wenkai Zhang <sup>1,\*</sup>

<sup>1</sup> Department of Physics and Applied Optics Beijing Area Major Laboratory, Center for Advanced Quantum Studies, Beijing Normal University, Beijing 100875, China

<sup>2</sup> Synchrotron Soleil, L'Orme des Merisiers, 91190 Saint-Aubin, France

<sup>3</sup> College of Textiles & Clothing, Qingdao University, Qingdao 266071, China

\* Correspondence: qingyu.kong@synchrotron-soleil.fr (Q.K.); wkzhang@bnu.edu.cn (W.Z.)

† These authors contributed equally to this work.

The fluorescence lifetime in Figure S1 is obtained by single exponential fitting in equation 1:

$$F(t) = A \cdot e^{-\frac{t}{\tau}} \quad (1)$$

where A is the amplitude of the fluorescence intensity.  $\tau$  is the lifetime that we can finally get.

Using the Glotaran program<sup>1</sup>, we performed global and target analysis (GTA) by inserting our target model into the program. The model is expressed in equation 2:

$$\psi(\lambda, t) = \sum_{l=1}^{n_{comp}} C_l(t) \cdot S_l(\lambda) \quad (2)$$

Where  $C_l(t)$  and  $S_l(\lambda)$  are unknown concentration profile and spectrum of components  $l$ , respectively. The species-associated decay spectra and concentration in Figures S2 and S3 are obtained from global and target analysis.

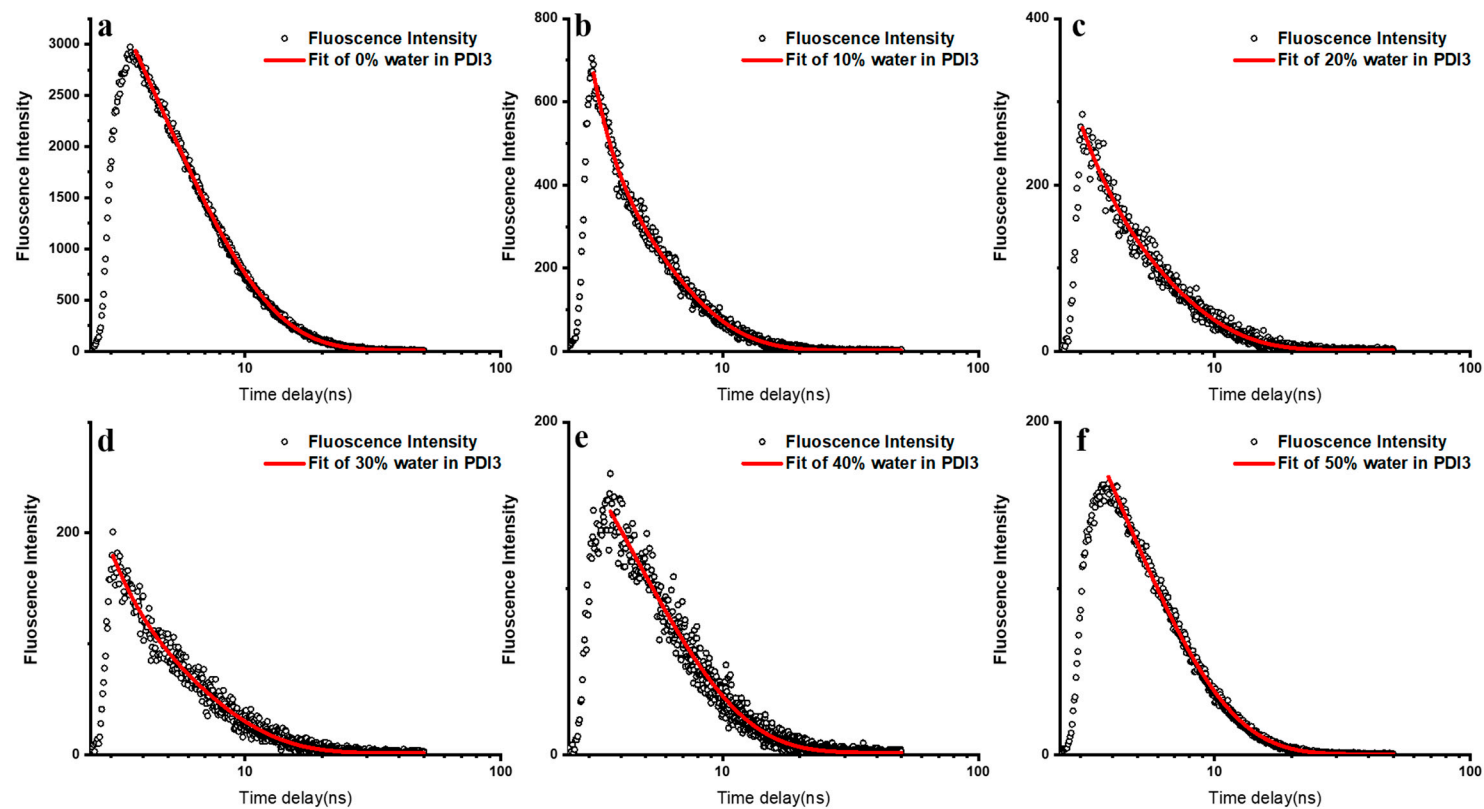

Figure S1. The fluorescence lifetime fitting of PDI trimer solutions with 480nm excitation when different percentages of water added: a:0%; b:10%; c:20%; d:30%; e:40%; f:50%.

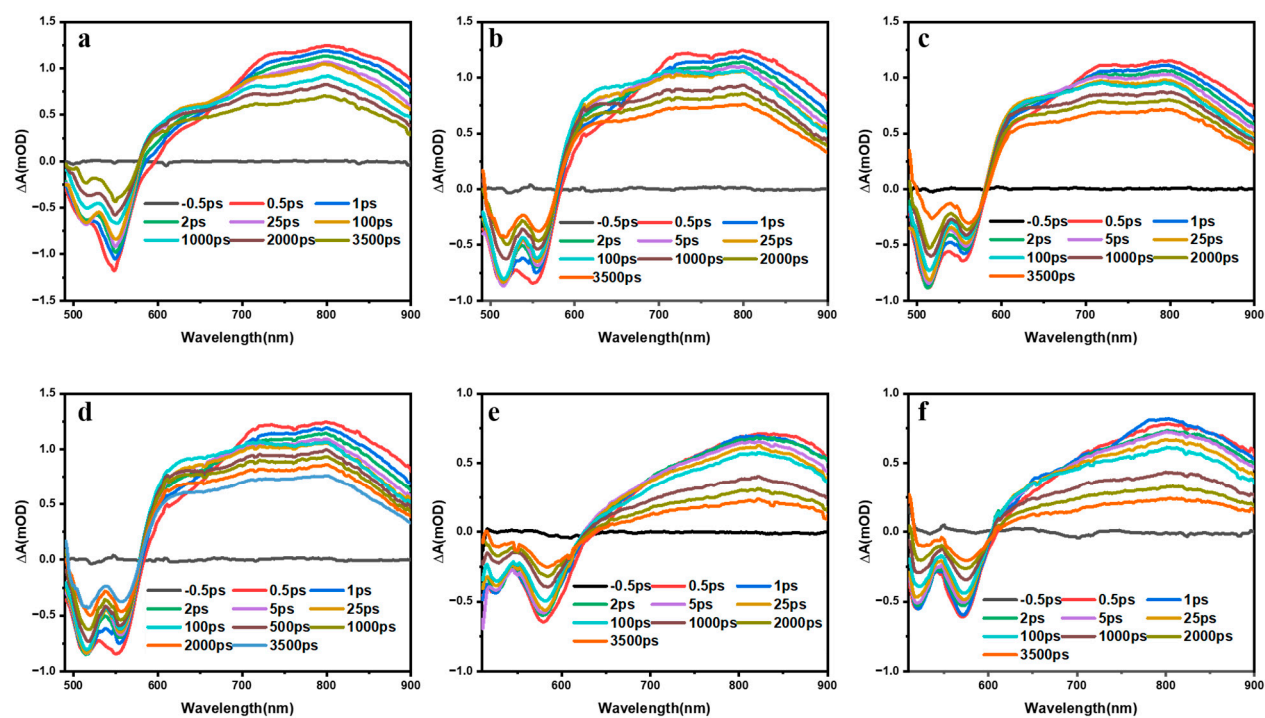

Figure S2. The transient absorption spectra of the PDI trimmer at all time delays with different water percentages: a:0%; b:10%; c:20%; d:30%; e:40%; f:50%.

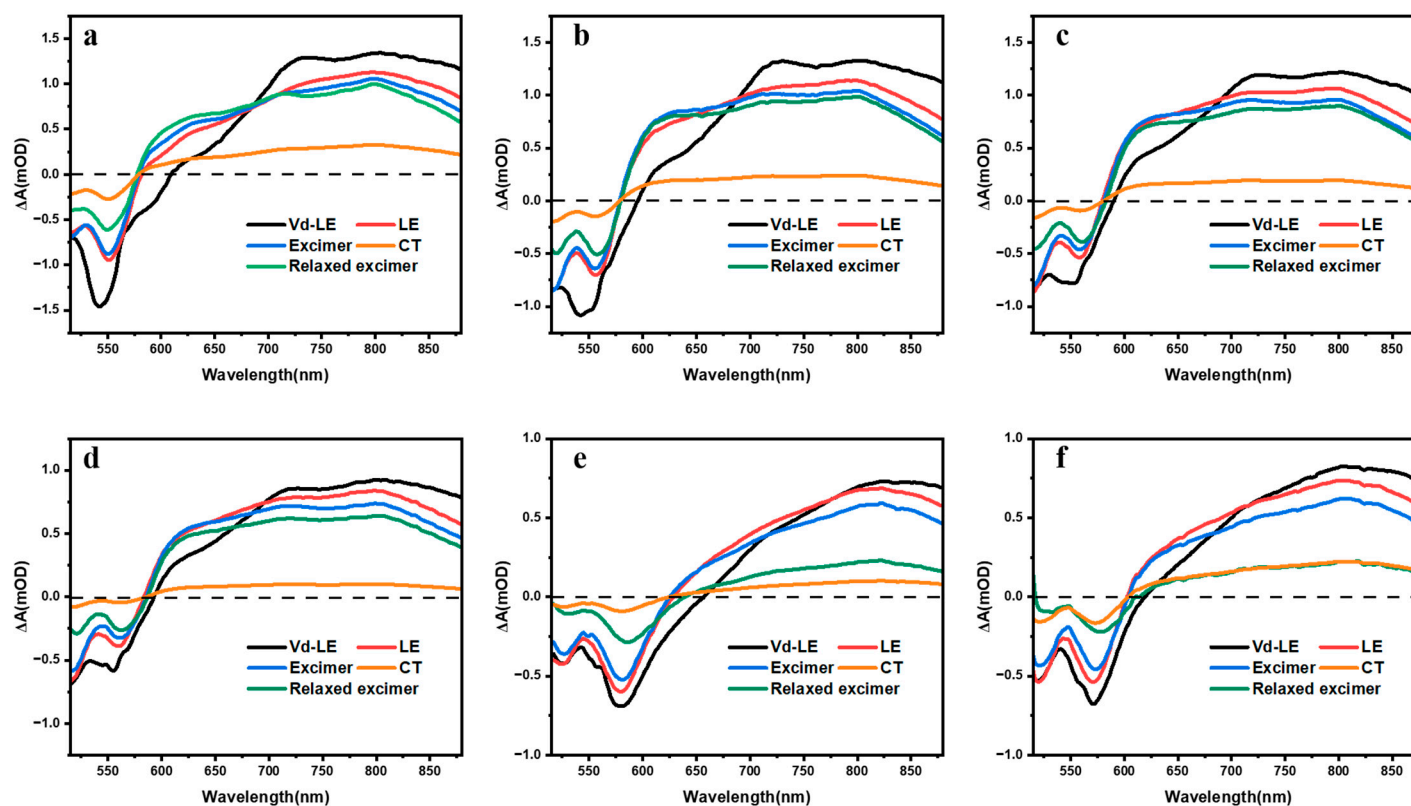

Figure S3. SADS data of different species with different water percentages: a:0%; b:10%; c:20%; d:30%; e:40%; f:50%.

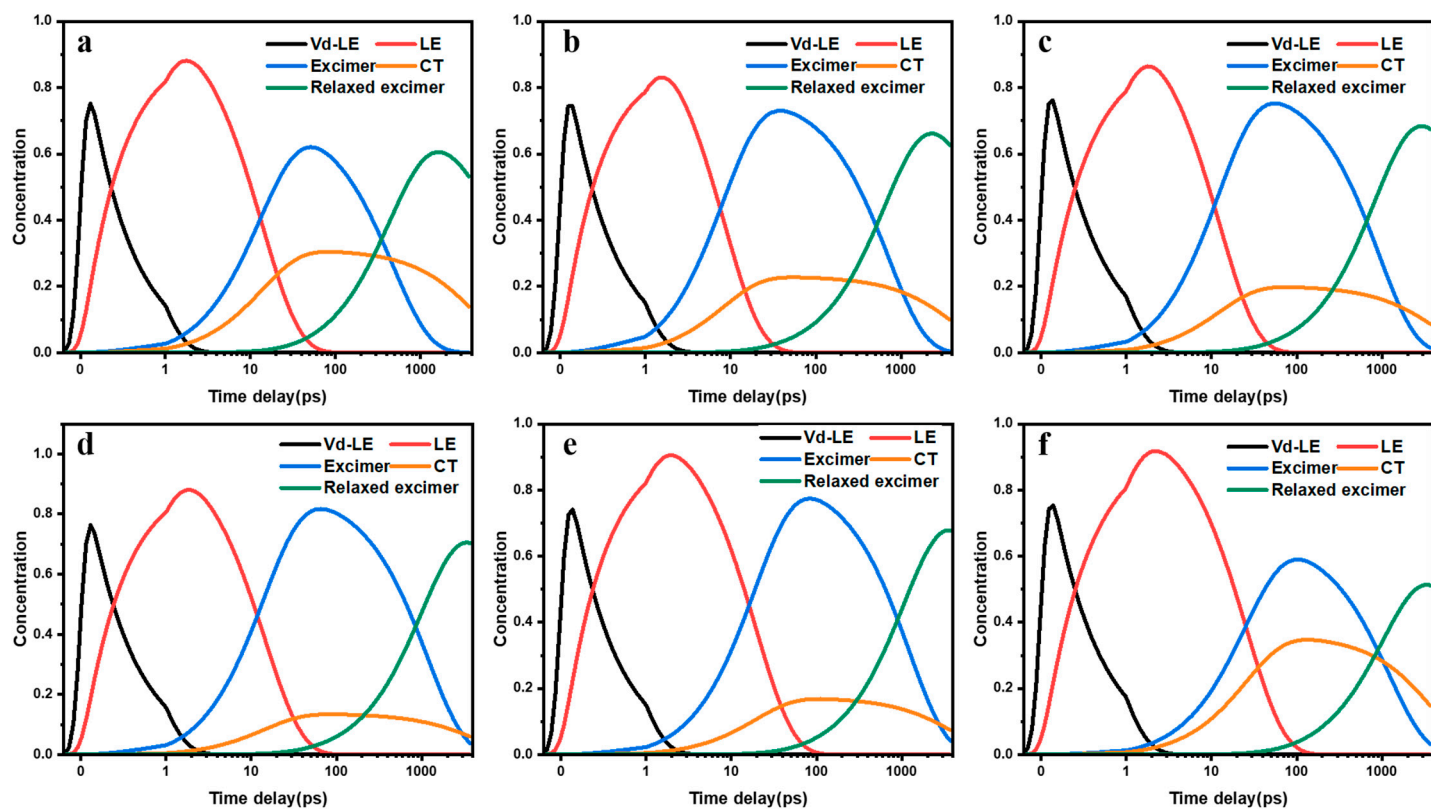

Figure S4. The concentration variations of corresponding processes when different water percentages: a:0%; b:10%; c:20%; d:30%; e:40%; f:50%.
